# Supplementary material for: Order and disorder effects in nano-ZrO2 investigated by micro-Raman and spectrally and temporarily resolved photoluminescence
Source: Royal Society of Chemistry journal article supplement (doi:10.1039/c2cp41946g), 2012-01-01
Supplement: c2cp41946g.pdf [file c2cp41946g.pdf]

# Order and Disorder Effects in Nano- ZrO<sub>2</sub> Investigated by Micro- Raman and Spectrally and Temporarily Resolved Photoluminescence

**Carmen Tiseanu<sup>\*a</sup>, Bogdan Cojocaru<sup>b</sup>, Vasile I. Parvulescu<sup>b</sup>, Margarita Sanchez Dominguez<sup>c,d</sup>,  
Philipp A. Primus<sup>e</sup>, Magali Boutonnet<sup>f</sup>**

<sup>\*a</sup> National Institute for Laser, Plasma and Radiation Physics, P.O.Box MG-36, RO 76900, Bucharest-Magurele, Romania; <sup>b</sup> University of Bucharest, Department of Chemical Technology and Catalysis 4 – 12 Regina Elisabeta Bvd., Bucharest 030016, Romania; <sup>c</sup> Instituto de Química Avanzada de Cataluña, Consejo Superior de Investigaciones Científicas (IQAC-CSIC), CIBER en Biotecnología, Biomateriales y Nanomedicina (CIBER BBN), Jordi Girona 18-26, 08034 Barcelona, SPAIN; <sup>d</sup> Centro de Investigación en Materiales Avanzados, S. C. (CIMAV), Unidad Monterrey; GENES-Group of Embedded Nanomaterials for Energy Scavenging, Alianza Norte 202, Parque de Investigación e Innovación Tecnológica, 66600 Apodaca, Nuevo León, MEXICO; <sup>e</sup>Institute of Chemistry, Physical Chemistry, University of Potsdam, Karl-Liebknecht-Str. 24-25, 14476 Potsdam-Golm, Germany; <sup>f</sup> Kungliga Tekniska Högskolan (KTH), School of Chemistry, Div. of Chemical Technology, Teknikringen 42, SE-10044, Stockholm, Sweden.

**Supplemental Information**

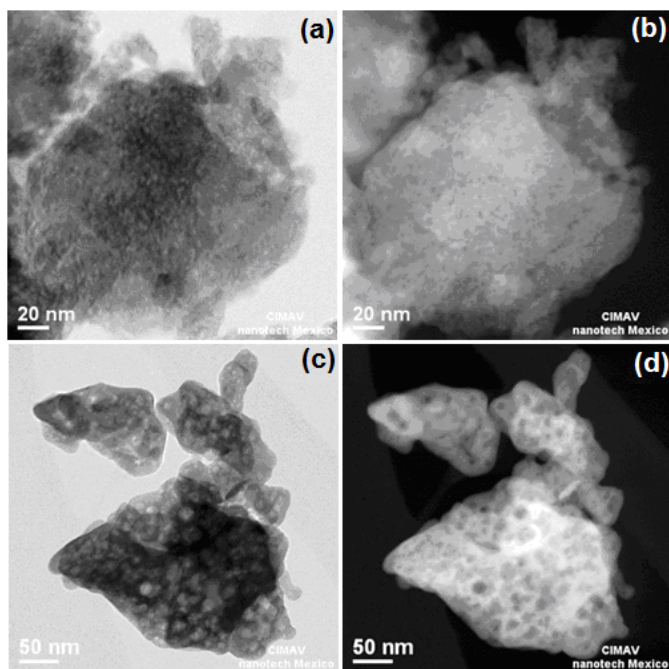

**Figure S1.** STEM images of calcined pure zirconia samples (ZE) synthesized in o/w microemulsions. ZE-500: (a) bright field and (b) dark field. ZE-1000: (c) bright field and (d) dark field.

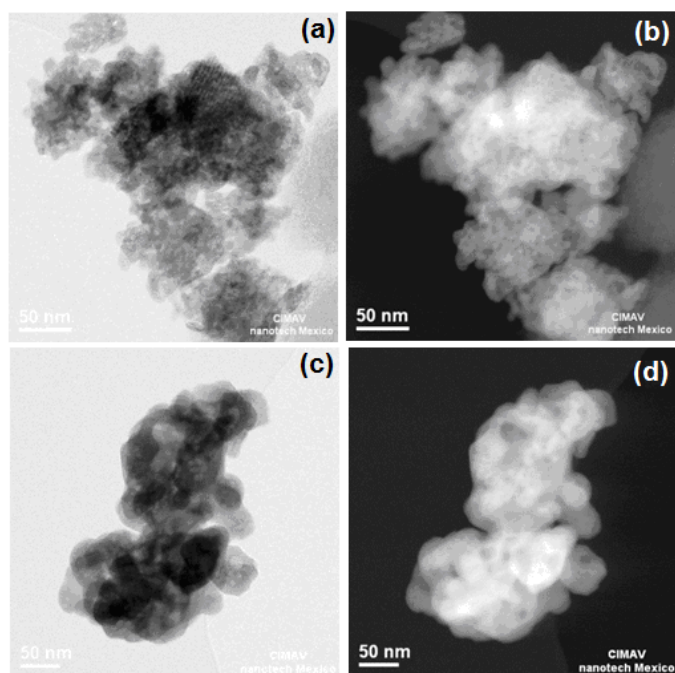

**Figure S2.** STEM images of calcined europium-doped zirconia (ZEB) samples synthesized in o/w microemulsions. 500/ZEB-500: (a) bright field and (b) dark field. 1000/ZEB-1000: (c) bright field and (d) dark field.

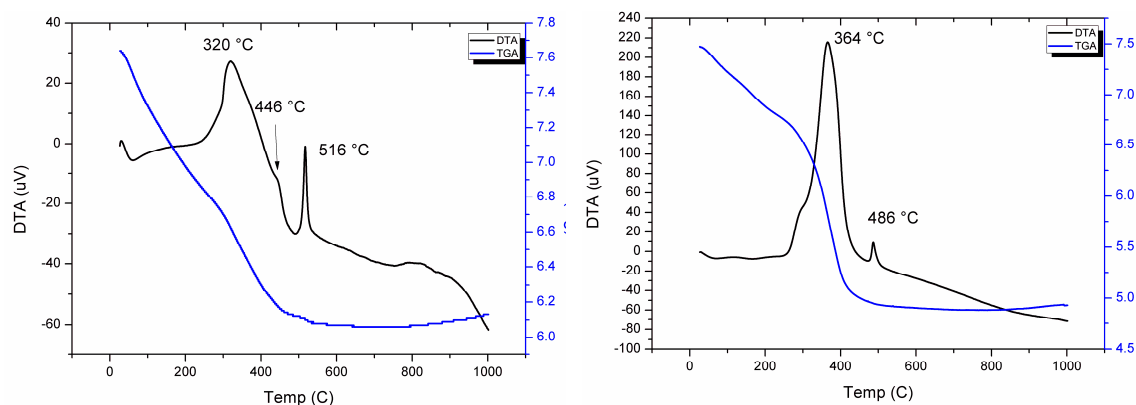

**Figure S3.** TGA and DTA curves for pure (ZE, a) and europium doped zirconia (ZEB, b) samples.

Textural characterization. Pure zirconia, ie ZE sample, after calcining at 350 °C exhibited a surface area of 253 m<sup>2</sup>g<sup>-1</sup> with an average pore size of 26.9 Å. Further calcinations at 500 and 1000 °C led to a strong decrease of the surface areas to 24 and 4 m<sup>2</sup>g<sup>-1</sup>, respectively. Doping with europium (ZEB sample) was not generating important differences in the texture of these materials. Thus, the surface areas of the samples calcined at 350, 500 and 1000 °C corresponded to 248, 31 and 5 m<sup>2</sup>g<sup>-1</sup>, that are in fact very similar.

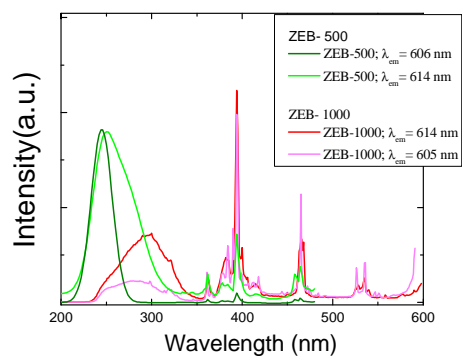

**Figure S4.** PL excitation spectra of europium in ZEB-500 and ZEB-1000.

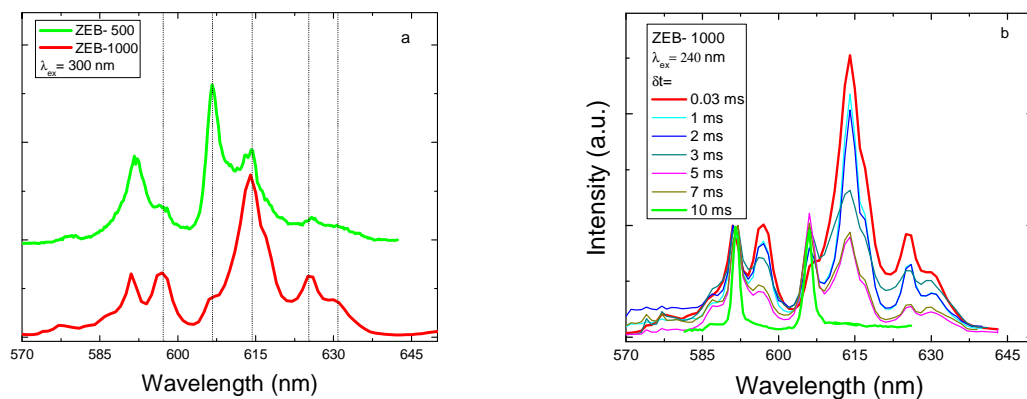

**Figure S5.** (a) Steady state PL spectra of ZEB-500 and ZEB- 1000; (b) Time-resolved PL spectra of ZEB- 1000 upon excitation at 240 nm.

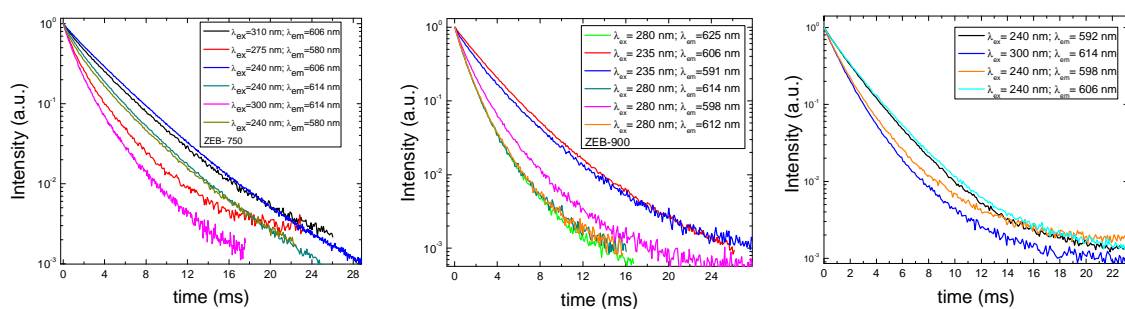

**Figure S6.** From Left to Right: PL decays of ZEB- 750, ZEB- 900 and ZEB- 1000. Emission and excitation wavelengths are indicated on the Figures.

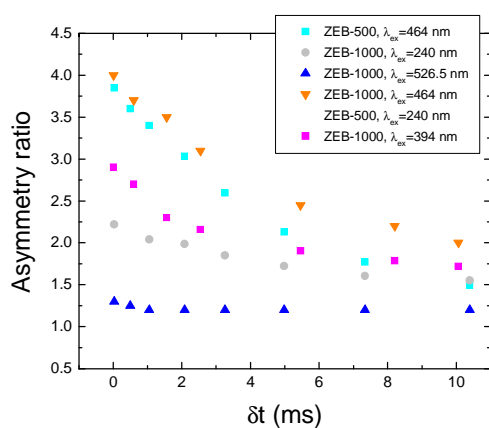

**Figure S7.** Evolution with delay time of the asymmetry ratio, R, of ZEB- 500 and ZEB- 1000.
